# Supplementary material for: Voices from the frontline: findings from a thematic analysis of a rapid online global survey of maternal and newborn health professionals facing the COVID-19 pandemic
Source: PubMed Central journal article supplement — BMJ Glob Health. 2020 Jun 24;5(6):e002967. doi: 10.1136/bmjgh-2020-002967 (PMC7335688; doi:10.1136/bmjgh-2020-002967), 2020-06-24
Supplement: bmjgh-2020-002967supp002.pdf [file bmjgh-2020-002967supp002.pdf]

**Figure S1** – Frequency distribution of respondents by country and total number of confirmed cases as of April 1<sup>st</sup> 2020\*

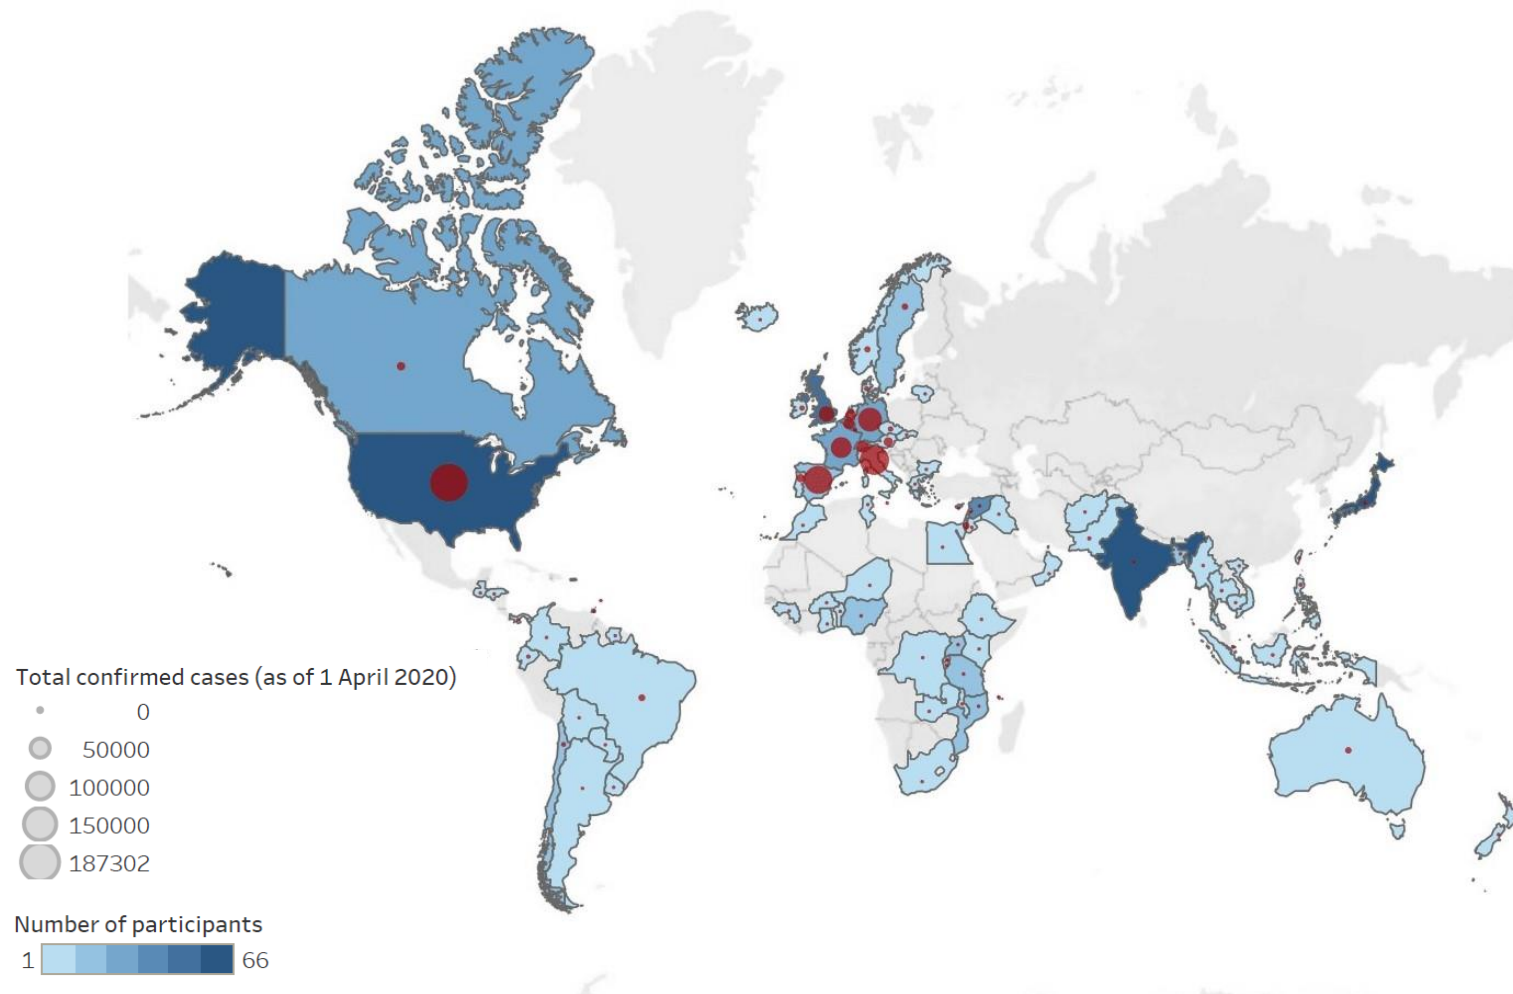

\*Data retrieved from: World Health Organization. Coronavirus disease (COVID-19) Situation Report-73. 2020. [https://www.who.int/docs/default-source/coronaviruse/situation-reports/20200402-sitrep-73-covid-19.pdf?sfvrsn=5ae25bc7\\_6](https://www.who.int/docs/default-source/coronaviruse/situation-reports/20200402-sitrep-73-covid-19.pdf?sfvrsn=5ae25bc7_6)
